## **COVID-19 vaccine acceptance in older Syrian refugees: preliminary findings from an ongoing study**

Noura Salibi MPH<sup>a</sup>, Sawsan Abdulrahim PhD<sup>b\*</sup>, Maria El Haddad MPH<sup>a</sup>, Stephanie Bassil MA<sup>c</sup>, Zeina El Khoury MA<sup>c</sup>, Hala Ghattas PhD<sup>a</sup>, Stephen J. McCall DPhil<sup>a</sup>

<sup>a</sup>Center for Research on Population and Health, Faculty of Health Sciences, American University of Beirut, Beirut, Lebanon

<sup>b</sup>Department of Health Promotion and Community Health, Faculty of Health Sciences, American University of Beirut, Beirut, Lebanon

<sup>c</sup>Norwegian Refugee Council (NRC), Beirut, Lebanon

### **\*Corresponding author:**

Sawsan Abdulrahim, PhD

Department of Health Promotion and Community Health

Faculty of Health Sciences

American University of Beirut

P.O.Box 11-0236

Riad El Solh/Beirut 1107 2020

Lebanon

Telephone: 00961 1 350000 ext. 4656

Fax: 00961 1 744470

Email: [sawsana@aub.edu.lb](mailto:sawsana@aub.edu.lb)

## **Abstract**

This study assesses COVID-19 vaccine intentions among a sample of Syrian refugees ( $\geq 50$  years) beneficiaries of a humanitarian organization in Lebanon, and explores factors associated with vaccine refusal. The findings are part of an ongoing rotating 4-wave panel study. The sample was limited to participants from the first panel who completed a phone interview between January-February, 2021. Out 1,037 beneficiaries, almost a third (29%) reported no intention to vaccinate. Reasons for refusal were: newness of the vaccine (35%); preference to maintain precaution measures (21%); belief that COVID-19 vaccine is not essential (21%); and other reasons (23%). COVID-19 vaccine refusal was significantly associated with perceptions regarding vaccine safety (OR: 5.97; 95%CI: 4.03-8.84) and effectiveness (OR: 6.80; 95%CI:4.44-10.42) but did not differ by age, presence of chronic conditions, self-reported adherence to COVID-19 measures, and perceptions of susceptibility to and severity of COVID-19. Addressing vaccine hesitancy among Syrian refugees in Lebanon necessitates disseminating accurate, accessible, and culturally appropriate information about vaccine safety and effectiveness.

## **Introduction**

Achieving COVID-19 herd immunity worldwide demands the implementation of equitable vaccination campaigns and overcoming multiple resource constraints such as accessibility to the vaccine, logistical capacities, and vaccine hesitancy<sup>1,2</sup>. Existing studies on COVID-19 vaccine hesitancy have focused on adults from the general population and healthcare workers<sup>3</sup>, with little evidence published on the perceptions of immigrants and refugees. As displaced populations are disproportionately affected by COVID-19 due to the syndemic effects of health and social vulnerabilities<sup>4</sup>, including them in national vaccination campaigns is paramount.

The Arab region, which hosts one of the largest refugee populations worldwide, reports very low COVID-19 vaccine acceptance rates<sup>3</sup>, with only 28.4% of adults in Jordan and 44% in Lebanon expressing willingness to get vaccinated<sup>5,6</sup>. Lebanon launched its COVID-19 vaccination campaign on February 14, 2021 pledging for an inclusive and equitable vaccination strategy. As the campaign rolls out, understanding the factors associated with vaccine acceptance and refusal is key for public health planning to achieve herd immunity.

## **Materials and Methods**

We present preliminary findings on COVID-19 vaccine intentions among older Syrian refugees in Lebanon. As of December 2020, Syrian refugees numbered 865,000 in a country of six million (UNHCR)<sup>7</sup>. The findings come from an ongoing rotating 4-wave panel study aiming to track older Syrian refugees' vulnerability to COVID-19 and adherence to public health measures. The sampling frame for the study was a beneficiaries list of a humanitarian organization and included a probability sample of Syrian households with at least one adult aged 50 years or older. Data for the study were collected through phone interviews. The study sample size is 3,838; however, the findings presented here are limited to a sample of 1,037 from the first panel who were interviewed between January 21, 2021 and February 22, 2021.

This study was granted approval by the Social and Behavioral Sciences Institutional Research Board. Participants voluntarily agreed to participate in the study following oral consent and had the right to refuse or withdraw participation at any time without affecting their access to benefits. Intention to vaccinate against COVID-19 was assessed using the following question: "If a safe and effective vaccine for COVID-19 became available, free, would you take it?" (Yes, No, Don't know, Refuse to answer). Using unadjusted logistic regression, we examined the association

between vaccine refusal and five constellations of factors: 1. Socio-demographics; 2. Presence of chronic illness; 3. General perceptions of vaccine safety and effectiveness; 4. Adherence with COVID-19 measures; 5. Perceptions of susceptibility to and severity of COVID-19.

## **Results**

The majority of the sample (66%) reported an intention to receive the COVID-19 vaccine if it is safe and free; almost one third (28.8%) reported no intention to vaccinate and 5.2% didn't know or refused to answer. Among those who reported no intention to vaccinate, the reasons provided were: newness of the vaccine and wanting to wait to know more (35%); preference to maintain public health precautions (21%); belief that the vaccine is not essential (21%); and other reasons including worry about the side effects of the vaccine, interactions with other medications, and lack of trust in the system (23%).

The findings in Table 1 demonstrate that COVID-19 vaccine acceptance was not positively associated with increased age or lower educational attainment; however, odds of refusal were statistically significantly higher among refugees living outside informal tented settlements (ITS) compared to those inside ITS. Those in the 70+ age category and those reporting chronic conditions did not significantly differ from younger participants or those without chronic conditions in their vaccine acceptance. This finding has important implications given that these are the two most at risk groups of COVID-19 severe illness and mortality<sup>8</sup>. Perceptions of vaccine safety and effectiveness were significantly associated with vaccine acceptance; for example those who disagreed with the statement that vaccines are safe were six times more likely to report refusal to vaccinate compared to those who believed in vaccines' safety. Finally, self-reported adherence to COVID-19 public health measures and perceptions of susceptibility to and severity of COVID-19 were not associated with vaccine acceptance.

## **Conclusion**

These preliminary findings highlight important directions towards enhancing vaccine acceptance among Syrian refugees in Lebanon to reach herd immunity and ensure that Syrian refugees, who make up a significant proportion of the resident population in the country, are not left behind. In Lebanon, where Syrian refugees experience security, mobility, and healthcare access barriers, humanitarian organisations ought to consider delivery of immunization services to older refugees

inside and outside ITSS. Practical approaches include disseminating accurate, accessible, and culturally appropriate information about vaccine safety and effectiveness. Importantly, these public health information campaigns must tackle the unprecedented surge of misinformation ‘infodemic’ about COVID-19 vaccines<sup>9</sup>; consider the integration of the Complacency, Convenience and Confidence (“3Cs”) model of vaccine hesitancy<sup>10</sup>; and work with community leaders, organisations and other key influencers to improve confidence, re-establish trust and address possible determinants influencing vaccine acceptability among Syrian refugees.

### **Declaration of competing interests**

The authors declare that they have no known competing financial interests or personal relationships that could have appeared to influence the work reported in this paper.

### **Contributors**

SA, HG, SM, SB and ZEK were involved in the conceptualization of the study and the survey design. SA and SM contributed to the literature search, interpretation of the data, and the writing of the manuscript. MH and NS contributed to data collection and analysis. NS contributed to the literature search and wrote the first draft of the paper. The underlying survey data were verified by SM and NS. All authors have reviewed, drafted and approved the final submitted version of the manuscript.

### **Funding Source**

This work was supported by ELRHA’s Research for Health in Humanitarian Crisis (R2HC) Programme, which aims to improve health outcomes by strengthening the evidence base for public health interventions in humanitarian crises. R2HC is funded by the UK Foreign, Commonwealth and Development Office (FCDO), Wellcome, and the UK National Institute for Health Research (NIHR). The views expressed herein should not be taken, in any way, to reflect the official opinion of the NRC or ELRHA. The funding agency was not involved in the data collection, analysis or interpretation.

## References

- 1 Chevallier C, Hacquin A-S, Mercier H. COVID-19 vaccine hesitancy: Shortening the last mile. *Trends in Cognitive Sciences* 2021. <https://doi.org/10.1016/j.tics.2021.02.002>
- 2 Schwarzingler M, Watson V, Arwidson P, Alla F, Luchini S. COVID-19 vaccine hesitancy in a representative working-age population in France: a survey experiment based on vaccine characteristics. *The Lancet Public Health* 2021. [https://doi.org/10.1016/S2468-2667\(21\)00012-8](https://doi.org/10.1016/S2468-2667(21)00012-8)
- 3 Sallam M. COVID-19 Vaccine Hesitancy Worldwide: A Concise Systematic Review of Vaccine Acceptance Rates. *Vaccines* 2021;9(2):160. <https://doi.org/10.3390/vaccines9020160>
- 4 Thomas CM, Osterholm MT, Stauffer WM. Critical Considerations for COVID-19 Vaccination of Refugees, Immigrants, and Migrants. *The American Journal of Tropical Medicine and Hygiene* 2021:tpmd201614. doi: [10.4269/ajtmh.20-1614](https://doi.org/10.4269/ajtmh.20-1614)
- 5 Sallam M, Dababseh D, Eid H, et al. High Rates of COVID-19 Vaccine Hesitancy and Its Association with Conspiracy Beliefs: A Study in Jordan and Kuwait among Other Arab Countries. *Vaccines* 2021;9(1):42. <https://doi.org/10.3390/vaccines9010042>
- 6 Wouters OJ, Shadlen KC, Salcher-Konrad M, et al. Challenges in ensuring global access to COVID-19 vaccines: production, affordability, allocation, and deployment. *The Lancet* 2021. [https://doi.org/10.1016/S0140-6736\(21\)00306-8](https://doi.org/10.1016/S0140-6736(21)00306-8)
- 7 United Nations High Commissioner for Refugees (UNHCR). Operational Portal - Refugee Situations 2021. <https://data2.unhcr.org/en/situations/syria>; 2021[accessed Feb 26, 2021].
- 8 Zhou F, Yu T, Du R, et al. Clinical course and risk factors for mortality of adult inpatients with COVID-19 in Wuhan, China: a retrospective cohort study. *The lancet* 2020;395(10229):1054-62. [https://doi.org/10.1016/S0140-6736\(20\)30566-3](https://doi.org/10.1016/S0140-6736(20)30566-3)
- 9 Makhoul J, Kabakian-Khasholian T, Chaiban L. Analyzing the social context of health information and misinformation during the COVID-19 pandemic: a case of emerging inequities in Lebanon. *Global Health Promotion* 2021:1757975920984178. <https://doi.org/10.1177/1757975920984178>
- 10 World Health Organization (WHO). Report on the SAGE Working Group on vaccine hesitancy 2014.

[https://www.who.int/immunization/sage/meetings/2014/october/1\\_Report\\_WORKING\\_GROUP\\_vaccine\\_hesitancy\\_final.pdf](https://www.who.int/immunization/sage/meetings/2014/october/1_Report_WORKING_GROUP_vaccine_hesitancy_final.pdf); 2014 [accessed Feb 24, 2021]

**Table 1. Key characteristics, beliefs, knowledge and medical history and their associations with COVID-19 vaccine acceptance**

|                                                                           | Total<br>(n=1037) | Acceptance of<br>COVID-19 vaccine<br>(n=684 (66.0%)) | Refusal of COVID-<br>19 vaccine<br>(n=299 (28.8%)) | Undecided<br>(n=54 (5.2%)) | Refusal of<br>COVID-19<br>vaccine <sup>a</sup> |
|---------------------------------------------------------------------------|-------------------|------------------------------------------------------|----------------------------------------------------|----------------------------|------------------------------------------------|
|                                                                           | n (%)             | n (%)                                                | n (%)                                              | n (%)                      | OR (95% CI)                                    |
| <b>Socio- Demographics</b>                                                |                   |                                                      |                                                    |                            |                                                |
| <b>Age (years)</b>                                                        |                   |                                                      |                                                    |                            |                                                |
| 50-59                                                                     | 629 (60.7)        | 420 (66.8)                                           | 184 (29.2)                                         | 25 (4.0)                   | 1                                              |
| 60-69                                                                     | 282 (27.2)        | 184 (65.2)                                           | 77 (27.3)                                          | 21 (7.5)                   | 0.96 (0.70-1.31)                               |
| 70+                                                                       | 126 (12.2)        | 80 (63.5)                                            | 38 (30.2)                                          | 8 (6.3)                    | 1.08 (0.71-1.66)                               |
| <b>Gender</b>                                                             |                   |                                                      |                                                    |                            |                                                |
| Male                                                                      | 579 (55.8)        | 394 (68.1)                                           | 157 (27.1)                                         | 28 (4.8)                   | 1                                              |
| Female                                                                    | 458 (44.2)        | 290 (63.3)                                           | 142 (31.0)                                         | 26 (5.7)                   | 1.23 (0.94-1.61)                               |
| <b>Residence</b>                                                          |                   |                                                      |                                                    |                            |                                                |
| Inside ITS                                                                | 402 (38.8)        | 283 (70.4)                                           | 102(25.4)                                          | 17 (4.2)                   | 1                                              |
| Outside ITS                                                               | 635 (61.2)        | 401 (63.2)                                           | 197 (31.0)                                         | 37 (5.8)                   | <b>1.36 (1.03-1.81)</b>                        |
| <b>Education</b>                                                          |                   |                                                      |                                                    |                            |                                                |
| Never attended school                                                     | 479 (46.4)        | 317 (66.2)                                           | 129 (26.9)                                         | 33 (6.9)                   | 1                                              |
| Attended school                                                           | 554 (53.6)        | 364 (65.7)                                           | 169 (30.5)                                         | 21 (3.8)                   | 1.14 (0.87-1.50)                               |
| <b>Health</b>                                                             |                   |                                                      |                                                    |                            |                                                |
| <b>Chronic conditions</b>                                                 |                   |                                                      |                                                    |                            |                                                |
| None                                                                      | 277 (27.8)        | 182 (65.7)                                           | 80 (28.9)                                          | 15 (5.4)                   | 1                                              |
| At least one                                                              | 718 (72.2)        | 472 (65.7)                                           | 207 (28.8)                                         | 39 (5.4)                   | 1.00 (0.73-1.36)                               |
| <b>Hypertension</b>                                                       |                   |                                                      |                                                    |                            |                                                |
| No                                                                        | 601 (60.6)        | 394 (65.5)                                           | 173 (28.8)                                         | 34 (5.7)                   | 1                                              |
| Yes                                                                       | 390 (39.4)        | 258 (66.2)                                           | 112 (28.7)                                         | 20 (5.1)                   | 0.99 (0.74-1.31)                               |
| <b>Diabetes</b>                                                           |                   |                                                      |                                                    |                            |                                                |
| No                                                                        | 771 (77.6)        | 513 (66.5)                                           | 220 (28.5)                                         | 38 (4.9)                   | 1                                              |
| Yes                                                                       | 222 (22.4)        | 140 (63.1)                                           | 66 (29.7)                                          | 16 (7.2)                   | 1.10 (0.79-1.53)                               |
| <b>Vaccination Perceptions</b>                                            |                   |                                                      |                                                    |                            |                                                |
| <b>I think vaccines are safe</b>                                          |                   |                                                      |                                                    |                            |                                                |
| Agree                                                                     | 670 (64.6)        | 504 (75.2)                                           | 144 (21.5)                                         | 22 (3.3)                   | 1                                              |
| Neither agree nor disagree or Don't know                                  | 211 (20.4)        | 129 (61.1)                                           | 68 (32.2)                                          | 14 (6.6)                   | <b>1.84 (1.30-2.61)</b>                        |
| Disagree                                                                  | 156 (15.0)        | 51 (32.7)                                            | 87 (55.8)                                          | 18 (11.5)                  | <b>5.97 (4.03-8.84)</b>                        |
| <b>I think vaccines are effective</b>                                     |                   |                                                      |                                                    |                            |                                                |
| Agree                                                                     | 680 (65.6)        | 510 (75.0)                                           | 148 (21.8)                                         | 22 (3.2)                   | 1                                              |
| Neither agree nor disagree or Don't know                                  | 226 (21.8)        | 135 (59.7)                                           | 74 (32.7)                                          | 17 (7.5)                   | <b>1.89 (1.35-2.65)</b>                        |
| Disagree                                                                  | 131 (12.6)        | 39 (29.8)                                            | 77 (58.8)                                          | 15 (11.4)                  | <b>6.80 (4.44-10.42)</b>                       |
| <b>COVID-19 Measure Adherence</b>                                         |                   |                                                      |                                                    |                            |                                                |
| <b>Attended social events</b>                                             |                   |                                                      |                                                    |                            |                                                |
| No                                                                        | 934 (94.0)        | 613 (65.6)                                           | 269 (28.8)                                         | 52 (5.6)                   | 1                                              |
| Yes                                                                       | 60 (6.0)          | 40 (66.7)                                            | 18 (30.0)                                          | 2 (3.3)                    | 1.02 (0.58-1.82)                               |
| <b>Mainly stayed at home except for essential purchasing</b>              |                   |                                                      |                                                    |                            |                                                |
| No                                                                        | 197 (19.8)        | 127 (64.5)                                           | 60 (30.4)                                          | 10 (5.1)                   | 1                                              |
| Yes                                                                       | 798 (80.2)        | 527 (66.0)                                           | 227 (28.5)                                         | 44 (5.5)                   | 0.91 (0.65-1.29)                               |
| <b>Received visitors at home</b>                                          |                   |                                                      |                                                    |                            |                                                |
| No                                                                        | 675 (67.8)        | 436 (64.6)                                           | 197 (29.2)                                         | 42 (6.2)                   | 1                                              |
| Yes                                                                       | 320 (32.2)        | 218 (68.1)                                           | 90 (28.1)                                          | 12 (3.8)                   | 0.91 (0.68-1.23)                               |
| <b>Worn a mask</b>                                                        |                   |                                                      |                                                    |                            |                                                |
| No                                                                        | 128 (12.9)        | 88 (68.8)                                            | 36 (28.1)                                          | 4 (3.1)                    | 1                                              |
| Yes                                                                       | 866 (87.1)        | 566 (65.4)                                           | 250 (28.8)                                         | 50 (5.8)                   | 1.08 (0.71-1.64)                               |
| <b>COVID-19 Perceived severity</b>                                        |                   |                                                      |                                                    |                            |                                                |
| <b>COVID-19 is a serious infection that is spreading across the world</b> |                   |                                                      |                                                    |                            |                                                |
| True                                                                      | 965 (95.9)        | 642 (66.5)                                           | 275 (28.5)                                         | 48 (5.0)                   | 1                                              |
| False                                                                     | 41 (4.1)          | 24 (58.5)                                            | 15 (36.6)                                          | 2 (4.9)                    | 1.46 (0.75-2.82)                               |
| <b>COVID-19 Perceived susceptibility</b>                                  |                   |                                                      |                                                    |                            |                                                |
| No                                                                        | 228 (23.5)        | 140 (61.4)                                           | 75 (32.9)                                          | 13 (5.7)                   | 1                                              |
| Yes                                                                       | 741 (76.5)        | 496 (66.9)                                           | 206 (27.8)                                         | 39 (5.3)                   | 0.77 (0.56-1.07)                               |

<sup>a</sup>The unadjusted ORs are for refusal of COVID-19 vaccine versus acceptance; the "undecided" were excluded from logistic regression analyses.
